# The *Drosophila* Sterile-20 Kinase Slik Controls Cell Proliferation and Apoptosis during Imaginal Disc Development

David R. Hipfner, Stephen M. Cohen\*

European Molecular Biology Laboratory, Heidelberg, Germany

**Cell proliferation and programmed cell death are closely controlled during animal development. Proliferative stimuli generally also induce apoptosis, and anti-apoptotic factors are required to allow net cell proliferation. Genetic studies in *Drosophila* have led to identification of a number of genes that control both processes, providing new insights into the mechanisms that coordinate cell growth, proliferation, and death during development and that fail to do so in diseases of cell proliferation. We present evidence that the *Drosophila* Sterile-20 kinase Slik promotes cell proliferation and controls cell survival. At normal levels, Slik provides survival cues that prevent apoptosis. Cells deprived of Slik activity can grow, divide, and differentiate, but have an intrinsic survival defect and undergo apoptosis even under conditions in which they are not competing with normal cells for survival cues. Like some oncogenes, excess Slik activity stimulates cell proliferation, but this is compensated for by increased cell death. Tumor-like tissue overgrowth results when apoptosis is prevented. We present evidence that Slik acts via Raf, but not via the canonical ERK pathway. Activation of Raf can compensate for the lack of Slik and support cell survival, but activation of ERK cannot. We suggest that Slik mediates growth and survival cues to promote cell proliferation and control cell survival during *Drosophila* development.**

## Introduction

Growth of tissues and organs during animal development involves careful coordination of the rates of cell proliferation, cell death, and differentiation (Neufeld et al. 1998; Conlon and Raff 1999). Cell proliferation depends on signals to stimulate cell growth and cell division. Cell survival is also dependent on intercellular signaling. A diverse array of long-range signals mediated by growth factors and cytokines as well as short-range signals mediated by cell surface proteins has been implicated in providing cells with growth and survival cues during development.

Systematic genetic screens for alterations in tissue growth in *Drosophila* imaginal discs have led to identification of a number of genes that promote cell proliferation and cell survival. *ras*, *myc*, *TSCI/TSC2*, and genes in the insulin pathway have been implicated primarily in control of cellular growth rates (Johnston et al. 1999; Prober and Edgar 2000; Saucedo and Edgar 2002 [reviewed in Oldham and Hafen 2003]). Cell growth and division rates are normally well coordinated, but excess activity of the insulin pathway, Ras, or Myc can cause cells to grow faster than they divide, leading to cellular overgrowth and concomitant tissue overgrowth. Other genes that cause tissue overgrowth when overexpressed do so without distorting cell size. Cyclin D and Cdk4 act together to promote coordinated cellular growth and cell division, leading to net cell proliferation (Datar et al. 2000; Meyer et al. 2000). The *bantam* gene encodes a microRNA that promotes net cell proliferation (Hipfner et al. 2002; Brennecke et al. 2003). *bantam* also prevents apoptosis by regulating translation of the apoptosis-inducing gene *hid* (Brennecke et al. 2003).

A different group of growth regulators have been identified in screens for loss-of-function mutations that cause tissue overgrowth. The *warts/lats*, *salvador/shar-pei*, and *hippo* genes

promote cell cycle exit and also stimulate developmentally controlled apoptosis (Justice et al. 1995; Xu et al. 1995; Kango-Singh et al. 2002; Tapon et al. 2002; Harvey et al. 2003; Wu et al. 2003). Salvador serves as a scaffold protein to bind the Warts serine–threonine protein kinase and the recently identified Hippo Sterile-20 (Ste20) kinase. Cells mutant for any of the components of this complex exhibit elevated expression of cyclin E, which promotes cell proliferation and overrides developmentally controlled exit from proliferation, leading to tissue overgrowth. Mutant cells are also resistant to developmentally regulated apoptosis by virtue of increased expression of the apoptosis inhibitor DIAP1.

Here we present the identification of another member of the Ste20 kinase family that contributes to the control of cell proliferation and apoptosis during imaginal disc development. We have named the *Drosophila* gene *slik* (SLK- and LOK-like kinase) on the basis of its similarity to the human SLK and LOK Ste20 kinases. Slik activity is required to support cell survival. Survival of mutant cells is impaired when they are in competition with normal cells, but also occurs in the

Received July 8, 2003; Accepted August 26, 2003; Published November 17, 2003  
DOI: 10.1371/journal.pbio.0000035

Copyright: ©2003 Hipfner and Cohen. This is an open-access article distributed under the terms of the Public Library of Science Open-Access License, which permits unrestricted use, distribution, and reproduction in any medium, provided the original work is properly cited.

Abbreviations: AEL, after egg laying; BrdU, bromodeoxyuridine; ERK, extracellular signal-regulated kinase; EST, expressed sequence tag; FLP, yeast Flp recombinase; FRT, Flp recombinase target site; GCK, germinal center kinase; GFP, green fluorescent protein; *lacZ*, *E. coli*  $\beta$ -galactosidase gene; MAP3K, MAP kinase kinase kinase; MEK, mitogen-activated protein kinase/extracellular signal-regulated kinase kinase; *ptc*, *patched*; *puc*, *puckered*; RTK, receptor tyrosine kinase; *slik*, SLK- and LOK-like kinase; Ste20, Sterile-20

Academic Editor: Matthew P. Scott, Stanford University

\*To whom correspondence should be addressed. E-mail: E-mail: cohen@embl.de

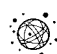

absence of cell competition, indicating that it is an intrinsic defect. Slik also promotes cell proliferation. Elevated Slik activity increases the rate of cell proliferation and also increases apoptosis. Tumor-like tissue overgrowth results when apoptosis is prevented. The phenotypes associated with *slik* mutants are essentially opposite to those of the Ste20 kinase Hippo, for which loss-of-function mutants cause tissue overgrowth and reduced apoptosis (Harvey et al. 2003; Wu et al. 2003). We suggest that Slik activity mediates growth and survival cues to promote cell proliferation and cell survival and present evidence that this depends on the activation of the MAP kinase kinase kinase (MAP3K) Raf, but not via the canonical extracellular signal-regulated kinase (ERK) MAP kinase (MAPK) pathway.

## Results

### Slik, a Ste20 Kinase Involved in Growth Control

Genes involved in regulating tissue growth were identified in a systematic overexpression screen (Hipfner et al. 2002). *EPg(2)20348* caused increased growth of the posterior compartment of the wing by 6% without inducing pattern abnormalities when expressed under control of the *en<sup>GAL4</sup>* driver. Though small in magnitude, this difference was reproducible and statistically significant. As will be shown below, considerably stronger growth effects were obtained when compensating apoptosis was prevented. To identify the gene overexpressed by *EPg(2)20348*, DNA flanking the single P-element insertion was sequenced. The *EPg* element was inserted in the first intron of *CG4527*, which we now name *slik* (Figure 1A and 1B). According to GADFLY (release 3), there are likely to be two transcripts produced by alternative splicing at the 3' end of *slik*. The shorter of these, *slik-RA*, encodes a 1300 amino acid protein and is identical in sequence to the cDNA we assembled from expressed sequence tags (ESTs) *LD34405* (AY119617) and *GH20991* (AY058322). The *slik-RB* transcript contains three additional 3' exons and is based on gene prediction and incomplete EST data.

Both predicted *slik* transcripts encode Ste20 group kinases. The Ste20 group is a large and heterogeneous group of kinases, divided into two large families and ten distinct subfamilies (Dan et al. 2001). Members of different subfamilies show little sequence similarity outside of the kinase domain, reflecting the diversity of functions that have been attributed to these proteins. *Drosophila* contains one member of each of the ten subfamilies. The predicted Slik protein shows highest homology to two human proteins, SLK and LOK. Together these proteins form a subfamily of Ste20 group kinases. The sequence similarity between them is largely restricted to an N-terminal kinase domain and a conserved C-terminal domain containing several coiled-coil motifs, separated by a nonconserved domain of variable length (Figure 1C). *EPg(2)20348* is located upstream of the entire coding sequence of *slik* and is oriented to drive its expression (Figure 1B). We confirmed by antibody labeling that *EPg(2)20348* directs GAL4-dependent Slik protein expression (data not shown).

### *slik* Mutants Display a Larval Growth Defect

Relatively little is known about the functions of Slik and Lok, though they may influence cytoskeletal dynamics and

cell adhesion (Endo et al. 2000; Sabourin et al. 2000; Wagner et al. 2002). To investigate the function of *slik* during *Drosophila* development, we screened for mutants generated by imprecise excision of *EPg(2)20348*. *slik<sup>1</sup>* is a deletion that removes exons 2–8 and part of exon 9 of the *slik* transcript, including the translation start site and the entire kinase domain (Figure 1B). *slik<sup>1</sup>* is expected to be a null allele. *slik<sup>1</sup>* is not mutant for the adjacent *mov34* gene and thus only affects the *slik* locus. The P-element *KG04837* is inserted in the first intron of *slik* and causes a partial loss of *slik* function (see below).

Homozygous *slik<sup>1</sup>* mutant animals showed a striking larval growth defect (Figure 2A). To characterize this in more detail, we collected first-instar larvae shortly after hatching, cultured them at low density, and tracked their viability and developmental progress. *slik<sup>1</sup>* homozygous mutant larvae were compared with similarly staged heterozygous control larvae. *slik* mutants were delayed with respect to growth and developmental timing (Figure 2B). After 5 d, the largest mutant larvae had grown to about one-third the size of controls (Figure 2A). Relatively few progressed as far as the third-larval instar. However, some larvae had an abnormally long lifespan. More than 5% of the mutant larvae remained alive for 15 d (three times longer than normal), and some reached a relatively normal third-larval instar size. To confirm that these defects are due to loss of *slik* function, we tested whether they could be reversed by expression of a

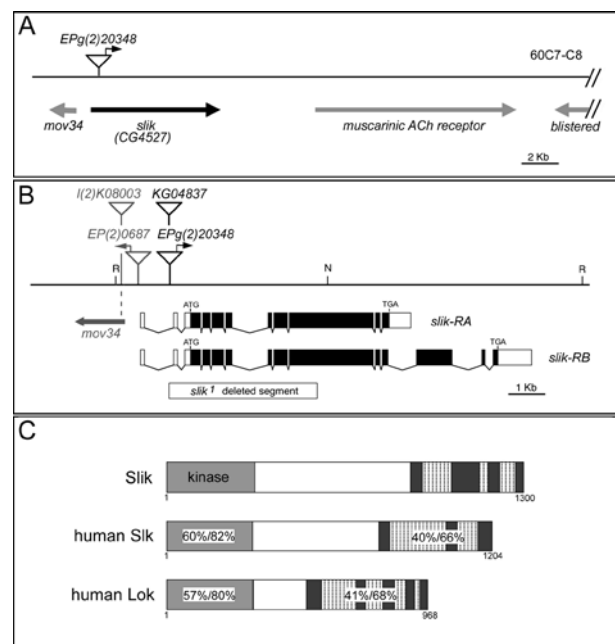

**Figure 1. Molecular Characterization of the *slik* Locus**

(A) Schematic representation of the *slik* region. Predicted genes are indicated.

(B) Detailed view of the *slik* region. The insertion sites of *EPg(2)20348* and *KG04837* in the first intron and the extent of the *slik<sup>1</sup>* deletion are indicated. *l(2)K08003* is an allele of *mov34*. N, *NotI*; R, *EcoRI*.

(C) Comparison of Slik with human SLK and LOK proteins. Numbers show sequence identity/similarity within the indicated domains. Predicted coiled-coil regions in the C-terminal domain are indicated by hatching.

DOI: 10.1371/journal.pbio.0000035.g001

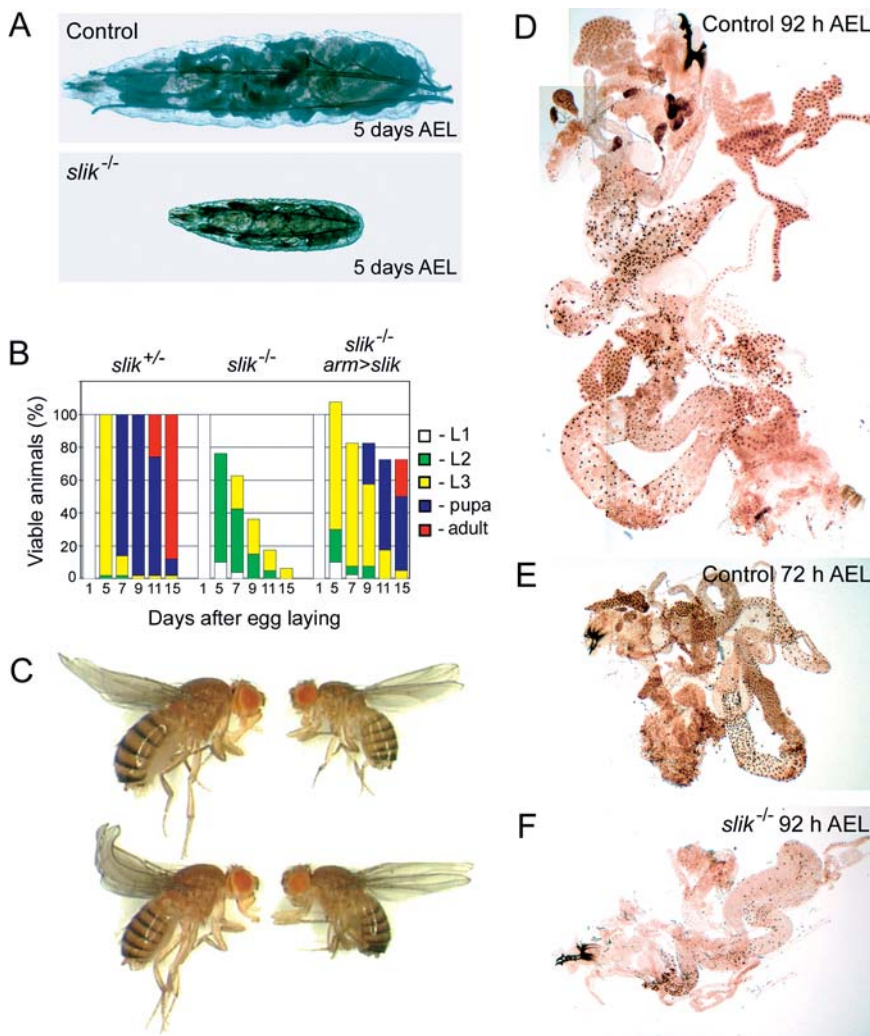**Figure 2.** Growth Defects in *slik* Mutants

(A) Heterozygous *slik*<sup>+/-</sup> control and homozygous *slik*<sup>-/-</sup> mutant larvae after 5 d of growth under uncrowded conditions.

(B) Growth and survival characteristics of *slik*<sup>+/-</sup> control and homozygous *slik*<sup>-/-</sup> mutant larvae. The percentage of animals at each developmental stage on the indicated days are shown by the colored bars. (Left) *slik*<sup>+/-</sup> control animals. (Middle) Homozygous *slik*<sup>-/-</sup> mutant animals. (Right) Percent expected homozygous *slik*<sup>-/-</sup> mutant females rescued by expression of Slik under control of *armadillo*<sup>GAL4</sup>. Note that only females received both the *armadillo*<sup>GAL4</sup> driver and the *UAS-slik* transgene. In competition with rescued females, male larvae die earlier than when all animals are homozygous mutant. The few surviving males are included in the 107% recovery at 5 d.

(C) Comparison of *slik*<sup>+/-</sup> control females (left) with homozygous *slik*<sup>-/-</sup> mutant females rescued by expression of Slik under control of *armadillo*<sup>GAL4</sup>. Note the reduced body size of the rescued flies. (D–F) Larval internal organs labeled by BrdU incorporation. (D and E) Control larvae fed BrdU from 76 to 92 h and 56 to 72 h AEL, respectively. All nuclei are brown, indicating BrdU incorporation during endoreplication. (F) *slik*<sup>-/-</sup> mutant larva fed from 76 to 92 h. Few nuclei were labeled. Note that the size is comparable to the much younger wild-type control.

DOI: 10.1371/journal.pbio.0000035.g002

*slik* transgene. Ubiquitous *armadillo*<sup>GAL4</sup>-driven *slik* expression rescued the larval growth defect and lethality (Figure 2B and 2C). Of 160 rescued mutant larvae examined, 115 survived to adulthood, albeit with a developmental delay of several days. These gave rise to adult flies of reduced body size, with mildly rough eyes, but of otherwise normal appearance (Figure 2C).

Most larval tissues grow by endoreplication, a process in which cells progress through a modified cell cycle consisting of rounds of DNA synthesis with no mitoses in between. The resulting polyploidy is necessary for growth of the larval tissues (Royzman et al. 1997; Britton and Edgar 1998). Mutations affecting the ability of larval cells to become polyploid by endoreplication can mimic the growth defects caused by starvation (Royzman et al. 1997; Galloni and Edgar 1999). We confirmed in control experiments using dye-stained food that over 90% of *slik* mutant larvae were feeding during the period from hatching until 72 h after egg laying (AEL), ruling out altered feeding behavior as a major cause of their growth defect. To ask whether *slik* regulates the endoreplication cycle, we cultured staged control and *slik*<sup>-/-</sup> larvae on food containing bromodeoxyuridine (BrdU) to label cells that had undergone DNA synthesis. Control larvae fed BrdU from 56 to 72 h or from 76 to 92 h showed extensive BrdU incorporation in larval tissues including the gut, fat

body, and salivary glands (Figure 2D and 2E). BrdU incorporation in *slik* mutant larvae was more variable. Most animals showed a marked decrease in the number of labeled cells (Figure 2F), suggesting that the proportion of cells undergoing endoreplication during the labeling period was decreased in the mutants. These observations indicate that *slik* is important for normal larval growth. Although not strictly necessary for endoreplication, *slik* may play a role in regulating the rate of endocycle progression in larval cells.

### *slik* Promotes Cell Survival

To evaluate the cellular basis for the larval growth defects, we examined the requirement for *slik* in diploid cells of the imaginal discs. Antibody labeling showed that Slik protein is expressed at a uniform level in the discs. We generated mosaic animals bearing *slik* mutant clones using FLP/FRT-mediated recombination. *slik* mutant clones were smaller than their simultaneously generated wild-type twin clones in the wing disc (Figure 3A). Mutant clones generated at  $48 \pm 2$  h covered on average only 44% the area of the corresponding wild-type twin clones (Figure 3B) and rarely reached a large size. When clones were induced earlier, many discs were found to contain wild-type twin spots with no mutant clones, indicating that the *slik* mutant cells were eliminated. We did

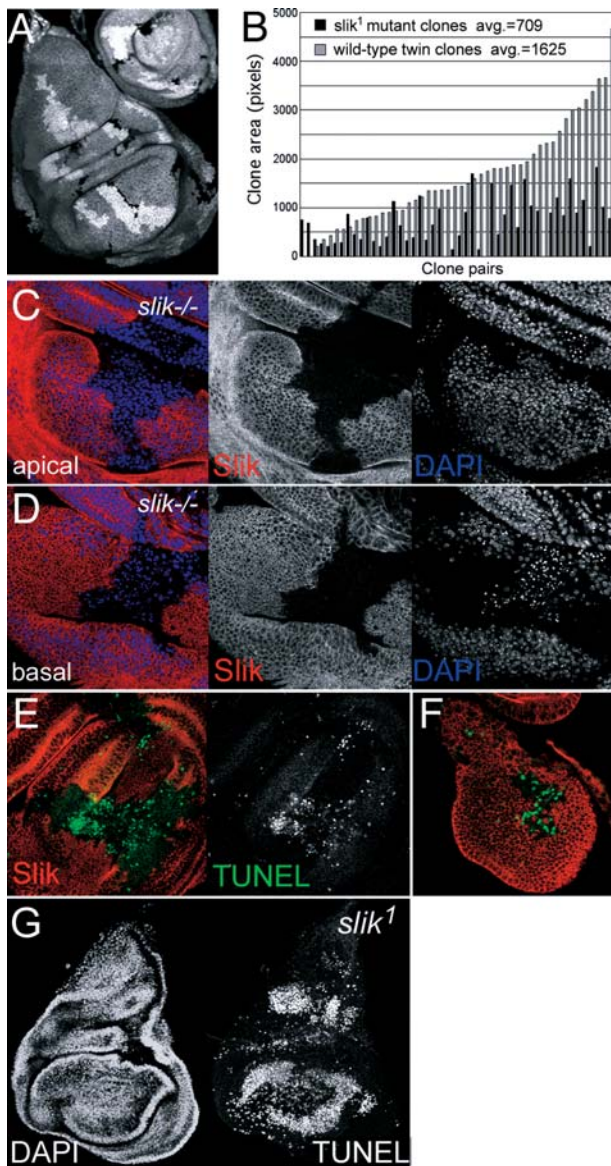

**Figure 3.** Growth and Survival Defects in *slik* Mutant Clones

(A) Wing imaginal disc with several homozygous *slik*<sup>1</sup> mutant clones and homozygous wild-type twin clones (part of a leg disc is visible at upper right). The homozygous wild-type and mutant cells are produced in the same cell division, so differences in size reflect differences in growth or cell survival after clone induction. Homozygous *slik*<sup>1</sup> mutant cells lack the βGAL marker protein and are unlabeled (black). Homozygous wild-type cells have two copies of the marker and appear brighter than heterozygous *slik*<sup>1/+</sup> cells.

(B) Area measurements of 48 pairs of homozygous *slik*<sup>1</sup> mutant and wild-type twin clones.

(C and D) Wing disc with a large homozygous *Minute*<sup>+</sup> *slik*<sup>1</sup> mutant clone produced in a *Minute* heterozygous background. Slik protein is shown in red. Blue shows DAPI-labeled nuclei. (C) and (D) are different optical sections of the same disc. (D) shows the pyknotic nuclei below the epithelial layer.

(E and F) Wing discs with large homozygous *Minute*<sup>+</sup> *slik*<sup>1</sup> mutant clones. Red shows a single optical section showing Slik protein. Green shows a projection of several optical sections showing TUNEL labeling to visualize apoptotic cells. (F) Mid-third instar disc.

(G) DAPI and TUNEL labeling of a *slik*<sup>1</sup> homozygous mutant wing disc.

DOI: 10.1371/journal.pbio.0000035.g003

not observe any position-dependent effects on clonal growth, suggesting that *slik* function is required in all wing disc cells.

Mutations that slow the rate of cell proliferation can cause cells to be out-competed by faster-growing wild-type cells. Cell competition can be reduced if mutant cells are provided with a growth advantage relative to neighboring cells. *Minute* genes encode ribosomal proteins and mutations impair growth by reducing the biosynthetic capacity of cells. We generated *slik*<sup>-/-</sup> *Minute*<sup>+/+</sup> clones in a *slik*<sup>+/+</sup> *Minute*<sup>+/+</sup> background. When given a growth advantage, *slik* mutant clones grew to relatively large sizes. The appearance and density of nuclei were normal in apical optical sections through *Minute*<sup>+</sup> *slik*<sup>1</sup> mutant clones; however, many mutant cells with pyknotic nuclei were extruded beneath the epithelium (Figure 3C and 3D), a feature typical of wing disc cells undergoing apoptosis. Apoptosis was verified using TUNEL staining to visualize DNA cleavage products in *Minute*<sup>+</sup> *slik*<sup>1</sup> mutant cells (Figure 3E). Outside the clones, a few dispersed clusters of TUNEL-positive cells appeared sporadically, as in normal discs (Milán et al. 1997). Many TUNEL-positive cells were observed in late-second/early-third instar *Minute*<sup>+</sup> *slik*<sup>1</sup> mutant clones (Figure 3F) and in wing discs taken from 13-d-old homozygous *slik*<sup>1</sup> mutant larvae, in which all cells are mutant (Figure 3G). These observations indicate that survival of *slik* mutant cells is impaired even when they are not in competition with wild-type cells. This suggests an intrinsic survival deficit in the mutant cells.

#### Amplification of Apoptosis in *slik* Mutant Cells by the JNK Pathway

The c-Jun N-terminal kinase (JNK) pathway is an effector of apoptotic cell death during imaginal disc development (Adachi-Yamada et al. 1999; Moreno et al. 2002a). JNK pathway activity can be monitored in the discs by transcriptional activation of *puckered* (*puc*), a dual-specificity phosphatase that acts in a negative-feedback loop to regulate the JNK pathway (Martin-Blanco et al. 1998). Transcription of a *puc-lacZ* reporter gene is normally low or absent in the wing disc. However, in response to apoptotic stimuli, *puc-lacZ* is induced in a JNK-dependent manner (Adachi-Yamada et al. 1999). We observed that *puc-lacZ* was induced in *Minute*<sup>+</sup> *slik*<sup>1</sup> mutant clones (Figure 4A), indicating apoptosis of *slik* mutant cells involves recruitment of the JNK pathway to amplify the apoptotic trigger. To confirm this, we compared the level of apoptosis in *slik* mutant clones induced in flies lacking the *hemipterous* (*hep*) gene, which encodes the kinase that activates JNK (JNKK). Removing Hep activity has been shown to suppress JNK-induced apoptosis (Adachi-Yamada et al. 1999). Apoptosis was visualized using an antibody to the activated form of caspase 3. Activated caspase was readily detected throughout the *Minute*<sup>+</sup> *slik*<sup>1</sup> mutant clones in a wild-type background (Figure 4B and 4C). The staining was most prominent in basal optical sections of the disc. Using phalloidin to label cortical actin, we observed that dying Slik-negative cells were extruded out the basal surface of the epithelium. Large *Minute*<sup>+</sup> *slik*<sup>1</sup> mutant clones in a *hep*-null background caused much less distortion of the discs and looked essentially normal in apical optical sections (Figure 4D). Levels of activated caspase were strongly reduced in these clones compared to *slik* mutant clones in the JNKK<sup>+</sup> background, even though many mutant cells were extruded on the basal surface of the epithelium (Figure 4D and 4E).

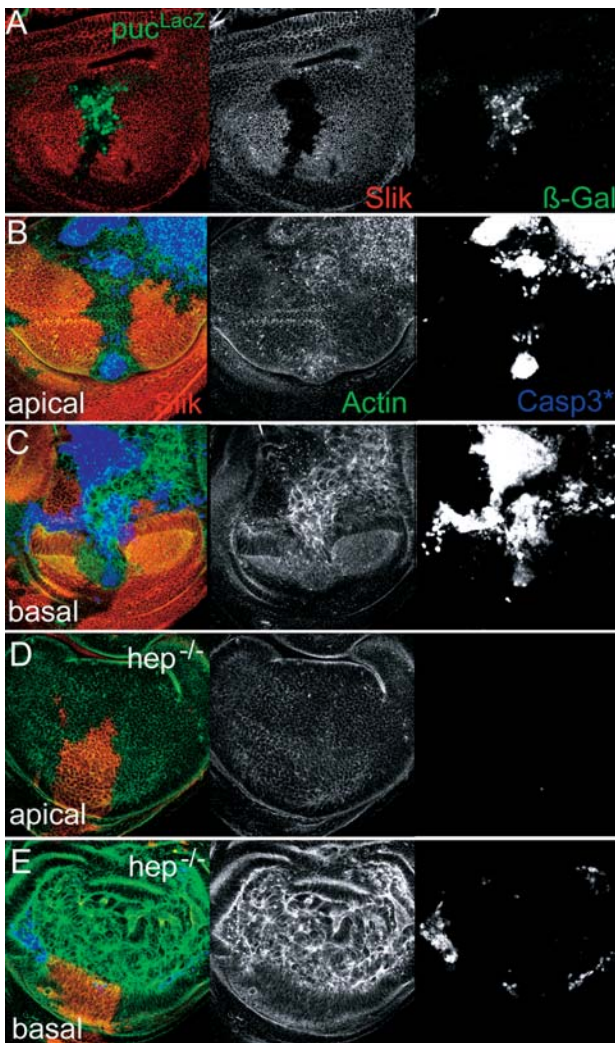

**Figure 4.** JNK Activity and *slik*-Dependent Apoptosis

(A) Wing disc with a *Minute<sup>+</sup> slik<sup>1</sup>* mutant clone. Red shows Slik protein. Green shows *puc-lacZ* reporter gene expression visualized by anti- $\beta$ GAL. Increased  $\beta$ GAL staining in the clone indicates *puc* transcription in response to JNK pathway activation. (B and C) Wing disc with large *Minute<sup>+</sup> slik<sup>1</sup>* mutant clones in an otherwise wild-type background. Blue shows activated caspase 3. Green shows actin visualized by phalloidin to show cell outlines. (B) and (C) are different optical sections of the same disc. Genotype: *+Y; FRT42D P( $\pi$ myc) M(2)53<sup>1</sup>/FRT42D slik<sup>1</sup>; hsFLP388<sup>+</sup>*. (D and E) Wing disc with large *Minute<sup>+</sup> slik<sup>1</sup>* mutant clones in a *hemipterous* mutant background. (D) and (E) are different optical sections of the same disc. Genotype: *hep<sup>73</sup>/Y; FRT42D P( $\pi$ myc) M(2)53<sup>1</sup>/FRT42D slik<sup>1</sup>; hsFLP388<sup>+</sup>*. Note the dramatic increase in clone size, relatively normal apical appearance, and reduction of apoptosis when JNK pathway activity is reduced in the absence of the *hep* JNKK. DOI: 10.1371/journal.pbio.0000035.g004

These observations indicate that activation of the JNK pathway contributes to apoptosis in *slik* mutant clones.

#### *slik* Mutant Cells Have the Capacity to Differentiate Normally

Despite the elevated rate of apoptosis observed in mutant clones and discs, many *slik* mutant cells survived and were integrated normally in the disc epithelium. To assess the developmental capacity of these cells, we examined adult wings bearing large *Minute<sup>+</sup> slik<sup>1</sup>* mutant clones generated at

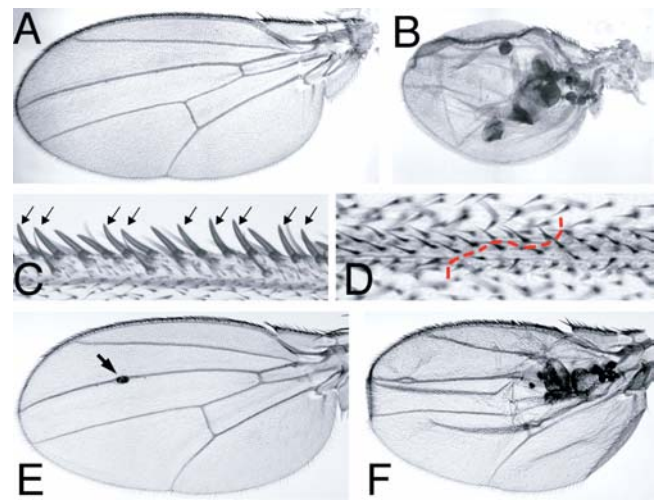

**Figure 5.** *slik* Mutant Clones in Adult Wings

(A and B) Cuticle preparations of adult wings from *w<sup>1118</sup> hs-FLP1Y; FRT42D P( $\pi$ ) P( $\pi$ ) M(2)l<sup>2</sup>/FRT42D slik<sup>1</sup>* larvae. (A) Adult wing from a larva not subjected to heat shock to induce clones. (B) Wing with large homozygous *Minute<sup>+</sup> slik<sup>1</sup>* mutant clones. Note the small size of the wing and the vesicles of black necrotic tissue between the layers of the wing. (C) Detail of a clone in the wing margin. Mutant cells, marked by *forked*, differentiate as normal wing margin bristles (arrows). (D) Detail of a clone in the wing blade. Mutant cells differentiate as normal wing blade and wing vein cells. The boundary of the clone in the vein is indicated by the dashed red line. (E and F) *slik<sup>KG04837</sup>/slik<sup>1</sup>* wings. In (E), the arrow indicates a small vesicle in a mildly affected wing. DOI: 10.1371/journal.pbio.0000035.g005

60  $\pm$  12 h. Most of these wings curved upward or downward to varying degrees, suggesting that there were differences in the sizes of the dorsal and ventral surfaces of the wing blade. In more severe cases, the wings were small and contained vesicles of blackened tissue (Figure 5A and 5B). These vesicles may derive from cells extruded on the basal side of the epithelium, which come to lie between the two layers of the wing blade. *slik* mutant cells that remained in the epithelium differentiated into morphologically normal wing blade cells, margin bristles, and wing veins (Figure 5C and 5D). Mutant cells were the same size as wild-type cells.

The *slik<sup>KG04837</sup>* mutant produced a similar, but milder, phenotype than *slik<sup>1</sup>*. *slik<sup>KG04837</sup>/slik<sup>1</sup>* flies showed a 13% decrease in viability. Nearly 40% of the wings in the surviving flies had phenotypes similar to those caused by *slik<sup>1</sup>* mutant clones. Most showed curvature of the wing blade surface or small isolated vesicles (Figure 5E, arrow). However, 30% of affected wings showed a stronger phenotype characterized by accumulation of vesicles and reduction in wing size (Figure 5F). These defects correlated with an increased level of apoptosis in wing discs (see Figure 10D).

#### *slik* Promotes Cell Proliferation and Tissue Overgrowth

We identified *slik* by its ability to promote overgrowth of the wing when expressed under GAL4 control. Overexpression of *slik* in the region between the third and fourth wing veins using *ptc<sup>GAL4</sup>* caused overgrowth, increasing the distance between these veins (Figure 6A–6C). In larvae raised at 18°C, transgene-driven *slik* expression resulted in a 13% increase in

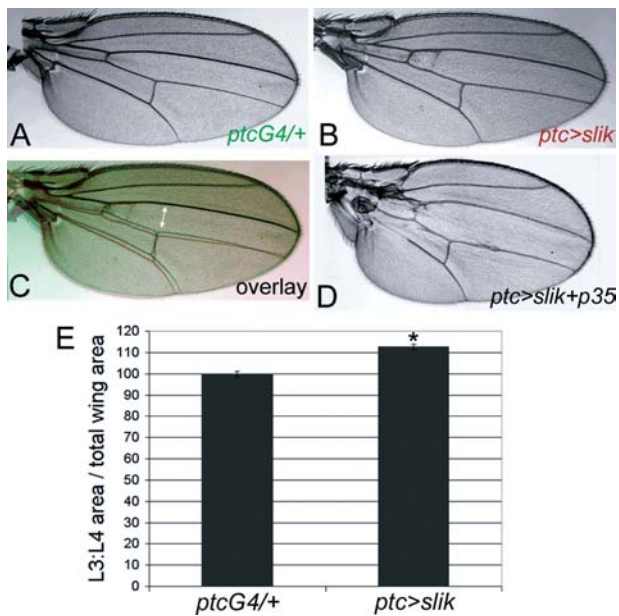

**Figure 6.** Slik-Induced Overgrowth in the Wing

(A) Cuticle preparation of a *ptc<sup>GAL4</sup>* adult wing.  
 (B) Cuticle preparation of a *ptc<sup>GAL4</sup> UAS-slik* adult wing.  
 (C) Overlay of (A) (green) and (B) (red) aligned in the anterior margin. Note the increased separation of veins 3 and 4 in the center of the wing (arrow).  
 (D) Cuticle preparation of a *ptc<sup>GAL4</sup> UAS-slik UAS-p35* adult wing. The separation of veins 3 and 4 is larger than in (C).  
 (E) Measurement of the area enclosed by veins 3 and 4 in *ptc<sup>GAL4</sup>* and *ptc<sup>GAL4</sup> UAS-slik* wings. Error bars indicate standard deviation (\*:  $p < 0.001$  using a Student's *t*-test).  
 DOI: 10.1371/journal.pbio.0000035.g006

the area bounded by veins 3 and 4 as a proportion of total wing area ( $p < 0.001$ ; Figure 6E). When larvae were raised at 25°C, which normally results in higher levels of transgene activation, we saw only a 5% increase in area, suggesting that *slik*-driven overgrowth is offset by a counteracting process. This was examined in more detail in imaginal discs using green fluorescent protein (GFP) to mark cells overexpressing *slik*. We noted abnormal apoptotic cell death in the domain of *slik* and GFP expression, even when the larvae were raised at 18°C. Cellular and nuclear morphology were normal within the plane of the epithelium, but pyknotic nuclei were visible in GFP-expressing cells extruded below the epithelium (Figure 7A and 7B). High levels of activated caspase were also detected in this region (data not shown). These observations suggested that *slik*, like many oncogenes, promotes cell proliferation and apoptosis in parallel.

To examine the effects of *slik* overexpression when cell death was blocked, we coexpressed *slik* and GFP with the viral caspase inhibitor p35. The combination of *slik* expression and suppression of apoptosis resulted in a strong further increase in tissue growth (Figure 7C). In addition to an increase in the number of *slik*-, p35-, and GFP-expressing cells in the epithelium, many GFP-positive cells with normal nuclear appearance were found in an abnormal outgrowth below the epithelial layer (Figure 7D and 7E). Co-expression of *slik* with p35 was lethal during pupal stages with most GAL4 drivers tested. However, we found some escapers at 18°C that showed additional overgrowth in the *ptc<sup>GAL4</sup>* expression domain (see

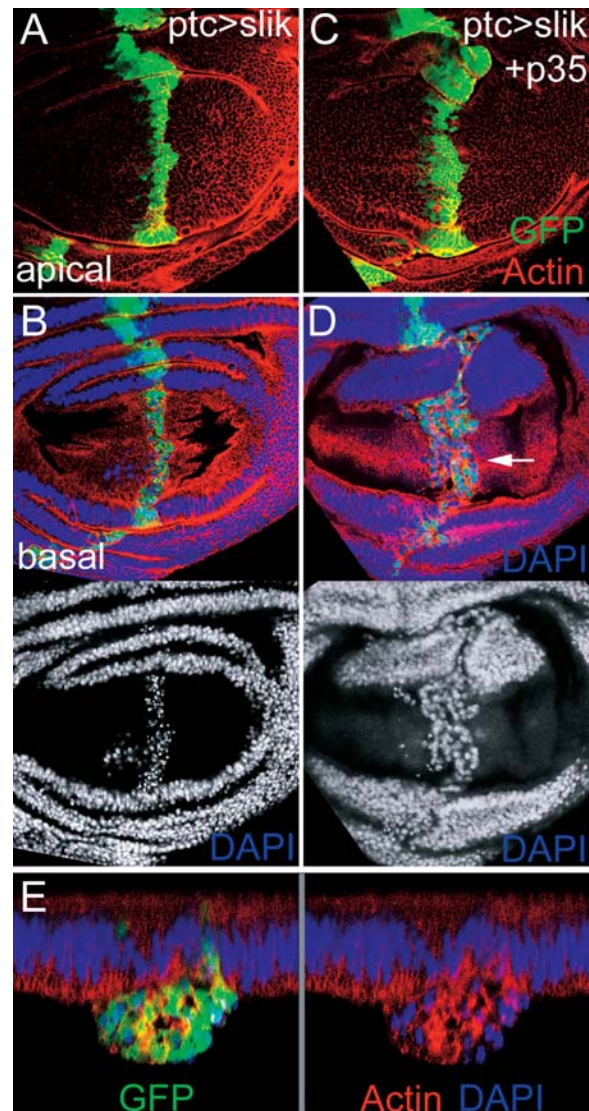

**Figure 7.** Slik Overexpression Induces Apoptosis

(A and B) Two views of one *ptc<sup>GAL4</sup> UAS-slik UAS-GFP* wing disc.  
 (A) Optical section in the columnar epithelial layer of the wing pouch. Red shows actin staining. Green shows *ptc<sup>GAL4</sup>*-expressing cells visualized by GFP. Blue shows DAPI staining.  
 (B) Basal optical section to show extruded GFP<sup>+</sup> cells with pyknotic nuclei. DAPI is shown below.  
 (C–E) *ptc<sup>GAL4</sup> UAS-slik UAS-GFP UAS-p35* wing disc. The GFP-expressing stripe is wider. Basally extruded cells have morphologically normal nuclei (arrow). In (E), optical cross-section show a large accumulation of *ptc<sup>GAL4</sup> UAS-slik UAS-GFP UAS-p35* cells below the epithelial layer.  
 DOI: 10.1371/journal.pbio.0000035.g007

Figure 6D). Abnormal outgrowths of tissue were also often found proximally in these wings.

To ask whether *slik*-driven tissue growth resulted from increased cell proliferation rather than from increased cell size (as results from activation of the insulin signaling pathway; Stocker and Hafen 2000), we performed flow cytometry on cells from dissociated discs. Slik-overexpressing cells showed a modest decrease in size (6% smaller than control cells using EPg(2)20348; 13% smaller using a stronger *UAS-slik* transgene; Figure 8A). Slik also had little effect on cell cycle profile (Figure 8B).

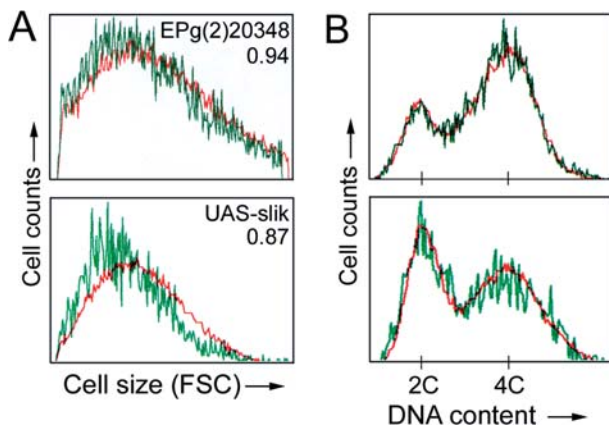

**Figure 8.** Analysis of Slik-Expressing Cells

Clones of cells expressing GFP and Slik expressed from *EPg(2)20348* (top) or *UAS-slik* transgene (bottom) were induced at  $48 \pm 2$  h AEL. Discs were dissected at 112 h AEL (*EPg(2)20348*) or 98 h AEL (*UAS-slik*), and cells were dissociated and analyzed by flow cytometry. Data for GFP and EP or transgene-expressing clonal cells are in green and nonexpressing control cells from the same discs are in red.

(A) Cell sizes estimated by forward scatter values. Numbers represent the ratio of forward scatter values for  $\text{GFP}^+/\text{GFP}^-$  cells.

(B) Distribution of cells in G1 (2C DNA content), S (2C–4C), and G2 (4C).

DOI: 10.1371/journal.pbio.0000035.g008

To verify that *slik*-induced tissue overgrowth resulted from increased cell proliferation, we used BrdU incorporation to label cells that had undergone DNA replication. During a 1-h labeling period cells in wing discs from control *ptc<sup>GAL4</sup>*, *UAS-GFP* larvae incorporated BrdU in a uniformly random pattern, typical of normal wing discs (Figure 9A). In contrast, there was a considerable increase in the number of cells that incorporated BrdU in the center of discs overexpressing *slik* under *ptc<sup>GAL4</sup>* control (Figure 9B). We noted that the region of increased proliferation was centered on the stripe of cells expressing the GAL4 driver, but was not limited to it.

To test the requirement for the kinase activity of Slik, we constructed a kinase-inactive version of the protein ( $\text{Slik}^{\text{kd}}$ ) by mutating aspartate<sup>176</sup> in the nearly invariant aspartate-phenylalanine-glycine triplet of kinase subdomain VII to asparagine. Expression of  $\text{Slik}^{\text{kd}}$  resulted in significantly more lethality than wild-type Slik with most GAL4 drivers tested (data not shown). However, the effects of the two proteins on proliferation of wing disc cells were remarkably similar. When coexpressed with p35 and GFP using *ptc<sup>GAL4</sup>*,  $\text{Slik}^{\text{kd}}$  caused an increase in the number of GFP-expressing cells and an increase in the number of cells that incorporated BrdU (Figure 9C). This suggests that Slik can drive cell proliferation by a kinase-independent mechanism.

In addition to the increased proliferation of the disc epithelium caused by Slik or  $\text{Slik}^{\text{kd}}$  overexpression, we noted a striking increase in cell proliferation in the overlying peripodial cell layer, reflected by increased nuclear density and BrdU incorporation (Figure 9D–9I). The region of elevated proliferation in the peripodial layer was situated directly above the *ptc<sup>GAL4</sup>* stripe in the columnar epithelial layer and was clearly separated from the *ptc<sup>GAL4</sup>* stripe in the peripodial layer. Note that the overproliferating cells were normal peripodial cells that were not expressing p35. This suggests that *slik* overexpression in the columnar epithelium

led to production of a signal that was able to stimulate proliferation of cells in the peripodial layer. Communication between these cell layers has previously been implicated in growth regulation, but the signals have been suggested to flow in the opposite direction (Gibson and Schubiger 2000; Gibson et al. 2002).

### Slik Acts via Raf to Control Proliferation and Cell Survival

A few Ste20 group kinases have been shown to act as upstream activators of MAPK-type pathways by regulating MAP3K activity (Dan et al. 2001). To determine whether *slik* function involves activation of MAPK signaling, we tested the ability of mutants in two *Drosophila* MAPK-type pathways (those mediated by JNK and ERK) to suppress *slik*-driven tissue growth. We observed limited modulation of *slik*-driven overgrowth in animals heterozygous for mutations in the JNKK *hep*, the JNK *basket*, the transcription factor *jun*, or the JNK phosphatase *puc* (20% or less). In contrast, *slik* showed strong genetic interactions with upstream components of the ERK pathway. Removing one copy of the *Drosophila* MAP3K Raf using the null allele *phl<sup>EA75</sup>* completely suppressed the effects of *slik*-driven overgrowth, restoring the wings to a wild-type appearance (Figure 10A and 10B). A weaker allele of Raf, *phl<sup>HIM7</sup>* produced a milder suppression of overgrowth (64%,  $p < 0.001$ ). Overgrowth was reduced by 37% in flies heterozygous for the MAPKK Sor, which acts downstream of Raf ( $p < 0.005$ ). A deficiency removing the *Drosophila* ERK Rolled had only a modest effect (15%). These observations raise the possibility that ERK may not be a major effector of Slik in promoting cell proliferation, although Raf appears to be one (see below).

If Raf acts as a downstream effector of Slik, we would expect removing one copy of the *raf* gene to enhance the severity of *slik* mutant phenotypes. The combination of the hypomorphic allele *slik<sup>KGO4837</sup>* and *slik<sup>1</sup>* produced viable flies at approximately 90% of the expected frequency (Figure 10C). Removing one copy of *raf* reduced the viability of the *slik* hypomorphs to approximately 40% and increased the penetrance of their wing phenotype from 39% to nearly 100%. The frequency of strongly affected wings increased from 11% to nearly 50% of the wings examined. The weaker *phl<sup>HIM7</sup>* allele caused a milder enhancement of these phenotypes.

*slik<sup>KGO4837</sup>/slik<sup>1</sup>* wing discs showed a considerable amount of apoptosis by TUNEL labeling (Figure 10D). The amount of apoptosis in the *slik<sup>KGO4837</sup>/slik<sup>1</sup>* background increased when one copy of *raf* was removed (a 1.75-fold increase in the average number of TUNEL-positive cells, 2.0-fold increase in median;  $p < 0.05$ ). We did not observe an increase in TUNEL-positive cells in *phl<sup>EA75/4</sup>* heterozygotes compared to wild-type. Thus, reduction of Raf levels specifically increased the amount of apoptosis and the severity of the subsequent phenotypic effects when Slik activity was compromised. These results, together with the ability of Raf to suppress Slik gain-of-function phenotypes, suggest that Raf is an important downstream effector of Slik in providing cell survival and cell proliferation cues.

To test this, we asked whether expression of an activated form of Raf could compensate for the absence of Slik. Clones of *slik<sup>1</sup>* mutant cells were produced using the Marcm system (Lee and Luo 1999) to allow GAL4-dependent expression of activated Raf in the *slik<sup>1</sup>* mutant cells. Clones of GFP-

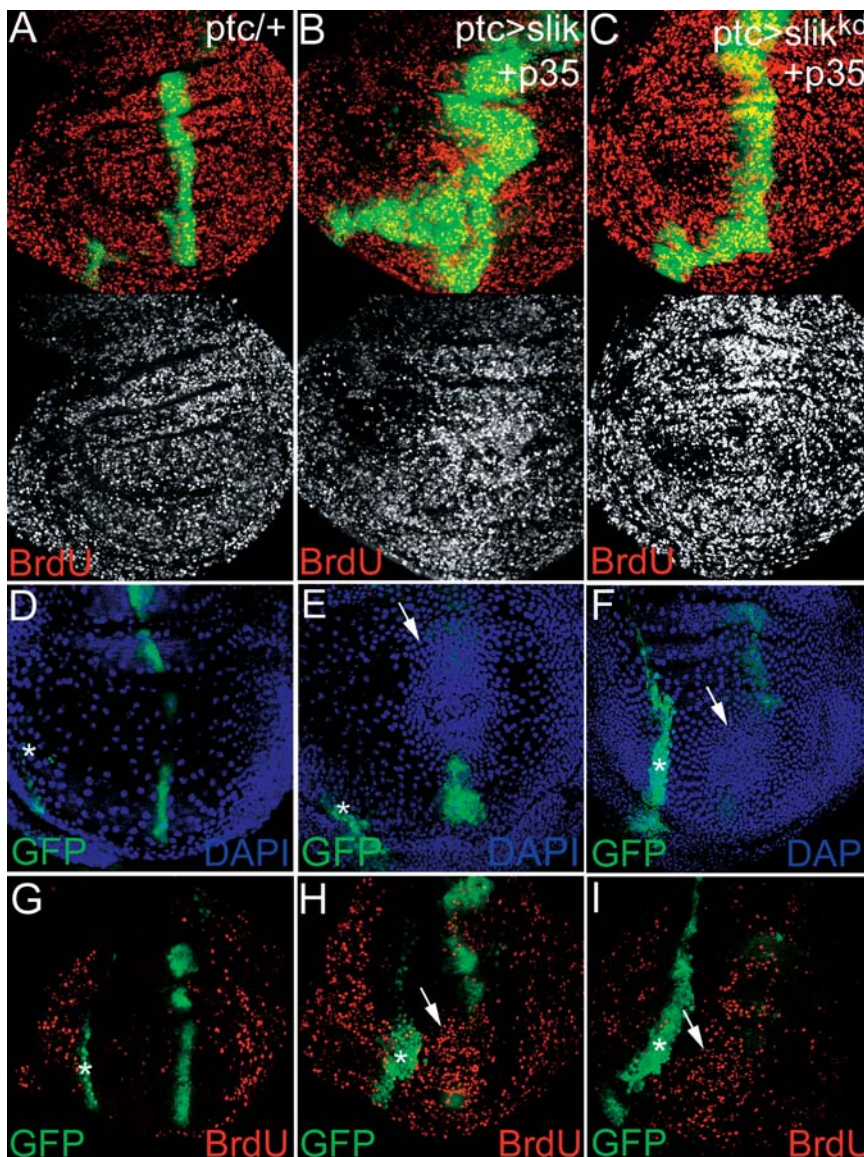

**Figure 9.** Nonautonomous Stimulation of Cell Proliferation by Slik-Expressing Cells

(A, D, G) *ptc<sup>GAL4</sup> UAS-GFP* wing discs. (B, E, H) *ptc<sup>GAL4</sup> UAS-slik UAS-GFP UAS-p35* wing discs. (C, F, I) *ptc<sup>GAL4</sup> UAS-slik<sup>kd</sup> UAS-GFP UAS-p35* wing discs. (A–C, G–I) BrdU incorporation (red). (A–C) Projections of several optical sections. (G–I) Sections of the overlying peripodial layer. (D–F) Peripodial cell nuclei visualized by DAPI. Arrows show high nuclear density above the *ptc<sup>GAL4</sup> UAS-GFP* stripe in the columnar epithelium in (E) and (F). Asterisks indicate the peripodial extension of the *ptc<sup>GAL4</sup>* stripe. (H and I) Cells in this region have incorporated more BrdU than control disc in (G). DOI: 10.1371/journal.pbio.0000035.g009

expressing *slik<sup>1</sup>* mutant cells were much smaller than their wild-type twin clones. In contrast, large *slik<sup>1</sup>* mutant clones were recovered that expressed activated Raf (Figure 10E and 10F). These clones were located on the basal surface of the epithelium, grew to quite large sizes, and had few pyknotic nuclei (and little evidence of apoptosis by TUNEL labeling; data not shown). This contrasts with *Minute<sup>+</sup> slik<sup>1</sup>* mutant clones, which showed very strongly elevated cell death inside the clones (see Figure 3E). Expression of p35 produced similar effects on survival of *slik<sup>1</sup>* mutant clones (data not shown). Comparable experiments expressing an activated form of ERK (R1<sup>SEM</sup>) did not suppress the survival defect of *slik<sup>1</sup>* mutant clones (Figure 10G). These clones are considerably smaller than their twins and contained many pyknotic nuclei, indicative of apoptosis (Figure 10G). The level of ERK activity generated by this transgene was sufficient to elicit the high threshold ERK response of vein formation. Thus, the failure to suppress cell death in *slik* mutant clones cannot be attributed to insufficient ERK activity (discussed below). These observations indicate that activation of Raf can

suppress the survival defect and promote proliferation of *slik<sup>1</sup>* mutant cells and suggest that Raf does not act via the canonical ERK MAPK pathway to do so. These differences may explain the strong genetic interactions between Slik and Raf mutants and the very limited genetic interaction between Slik and ERK (Rolled) mutants.

The strong genetic interactions between Slik and Raf prompted us to ask whether Slik can bind directly to Raf. Co-immunoprecipitation experiments were performed using S2 cells transfected to express Myc-tagged Raf. Immunoprecipitation of endogenous Slik protein from S2 cells was able to coprecipitate Raf (Figure 11, lane 6; the loading control represents 25% of input). Cotransfection of S2 cells to express Slik or the kinase inactive Slik<sup>kd</sup> increased the recovery of Raf in the coimmunoprecipitation (Figure 11, lanes 4 and 5). The relationship between Slik and Raf resembles that reported for the Ste20 kinase germinal center kinase (GCK) and the MAP3K MEKK1 in that GCK binds to MEKK1 and activates it in a kinase-independent manner (Chadee et al. 2002). Our results suggest that activation of Raf



is mediated by binding to Slik, rather than by phosphorylation of Raf by Slik. We examined the level of ERK phosphorylation in S2 cells transfected to overexpress Slik or Slik<sup>kd</sup>. No significant difference was observed (data not shown). Taken together with the finding that expression of activated ERK cannot rescue the *slik* mutant survival defect in vivo, these findings suggest that Raf does not act via the canonical ERK MAPK pathway to mediate Slik's activity in supporting cell survival and promoting cell proliferation.

## Discussion

In this report we have identified the Ste20 group kinase Slik as a mediator of cell survival and cell proliferation signaling in *Drosophila*. *slik* is an essential gene. Loss of *slik* function results in a larval growth defect characterized by slow growth and a decreased rate of endoreplicative cell cycling in polyploid larval cells, developmental delay, and eventually death. The behavior of *slik* mutant clones suggests that diploid cells lacking *slik* proliferate more slowly than normal and are eliminated by apoptosis. Even when removed from cell competition, *slik* mutant cells exhibit an intrinsic survival defect. Our findings suggest that this is due to insufficient activation of Raf. Indeed, activation of Raf can compensate for the absence of Slik in supporting cell survival. Whereas reduced Slik activity limits growth due to increased apoptosis, increased Slik activity promotes growth by increasing the rate of cell proliferation. Slik-induced proliferation is counteracted by increased apoptosis. The increase in proliferation and apoptosis is due to over-activation of Raf, as both proliferation and apoptosis can be suppressed by reducing Raf activity. These observations suggest that Raf may be the principal mediator of Slik activity in promoting cell survival and cell proliferation.

At present, the upstream signals that control Slik activity are not known. Activation of MAPK pathways by Ste20 kinases such as NCK and GCK has been linked to the interleukin and TNF receptor effector proteins TRAF2 and TRAF6 (Baud et al. 1999; Chadee et al. 2002). A *Drosophila* TNF ligand and receptor have been identified and shown to act via Apaf1 and DRONC to induce apoptosis (Igaki et al. 2002; Kanda et al. 2002; Moreno et al. 2002b). Cell survival and proliferation also depend on multiple inputs. Information about the nutritional state of the animal is transmitted by the insulin/PI3K pathway (e.g., Britton et al. 2002). In addition to the EGFR/ERK pathway, the Dpp, Wg, and Notch pathways provide growth and survival cues (Go et al. 1998; Miller and Cagan 1998; Baonza and Garcia-Bellido 1999; Milán et al. 2002; Moreno et al. 2002a). We do not know whether these or other signals act via Slik to control cell survival and cell proliferation during development.

### Slik Can Activate Raf in a Kinase-Independent Manner

The proliferative and cell-survival signaling effects of Slik appear to be mediated through Raf. Signals from receptor tyrosine kinases (RTKs) act via the small GTPase Ras to activate Raf (Schlessinger 2000). In its GTP-bound active state, Ras recruits Raf to the cell membrane, where it is activated by a mechanism involving protein-protein and protein-lipid interactions as well as phosphorylation and dephosphorylation of key residues (reviewed in Dhillon and Kolch 2002). Some members of the Ste20 kinase family act as

MAP4Ks to activate Raf and other MAP3Ks, whereas others act in a kinase-independent manner (reviewed in Dan et al. 2001). HPK1 and PAK2 act as MAP4Ks to phosphorylate MEKK1 and Raf. The Ste20 protein GCK activates MEKK1 in a kinase-independent manner to transduce signals from TNF family receptors via the JNK pathway. Oligomerization of MEKK1 by GCK1 is thought to lead to its activation by autophosphorylation (Chadee et al. 2002). Our finding that the proliferative effects of Slik and its ability to bind Raf are independent of its kinase activity suggests that Slik activates Raf as a consequence of binding, perhaps by oligomerization, as has been suggested for GCK and MEKK1.

Although the kinase-inactive form Slik<sup>kd</sup> can produce the same effects as the unmodified form of Slik in overexpression assays, low-level ubiquitous expression of Slik<sup>kd</sup> was not able to rescue *slik*<sup>l</sup> mutant larvae. A wild-type *slik* transgene rescued the mutant to viability under comparable conditions. In fact, Slik<sup>kd</sup> expression enhanced the severity of the *slik*<sup>l</sup> survival defect. The *slik*<sup>l</sup> mutant lacks the kinase domain and should express no protein, so Slik<sup>kd</sup> is unlikely to act as a dominant negative for endogenous Slik. Indeed, low-level ubiquitous expression of Slik<sup>kd</sup> had no effect in wild-type animals. Thus, Slik<sup>kd</sup> may compete for the activity of a different kinase that phosphorylates Slik targets in the absence of endogenous Slik.

One interpretation of our findings is that the kinase activity of Slik is required to activate Raf at normal Slik levels, but that this requirement can be circumvented under conditions of overexpression. If there is a difference in the ability of the two forms of Slik to activate Raf, it does not appear to be reflected in their ability to bind Raf as assayed by coimmunoprecipitation, but many other possibilities exist. For example, Slik kinase activity may not be required for Raf activation, but may be required to allow Slik to perform other functions during development.

### Does Slik Have Other Functions?

Preliminary evidence suggests that Slik may also regulate the actin cytoskeleton. For example, rescue of the *slik* mutant cell-survival defect by expression of p35 or activated Raf did not prevent cells from exhibiting an abnormal arrangement of actin and dropping out of the disc epithelium. This suggests a Raf-independent role for Slik that is required to allow normal organization of the actin cytoskeleton and for normal cell interactions within the epithelium. In this context, it is interesting that human SLK and LOK are thought to influence cytoskeletal dynamics and cell adhesion (Endo et al. 2000; Sabourin et al. 2000; Wagner et al. 2002). Future work will be directed toward determining whether this reflects an independent function of Slik that requires it to function as a kinase.

### Distinct Modes of ERK Activation for Cell Survival and Proliferation versus Cell Fate Specification

The Ras-Raf-MEK-ERK signaling cassette regulates cell fate specification, proliferation, and cell survival downstream of the EGFR in the imaginal discs. Clones of cells mutant for components of this pathway proliferate poorly and are frequently lost even when given a growth advantage (Xu and Rubin 1993; Diaz-Benjumea and Hafen 1994; Prober and Edgar 2000). In the eye, activity of this pathway is required for cell survival and cell cycle progression posterior to the morphoge-

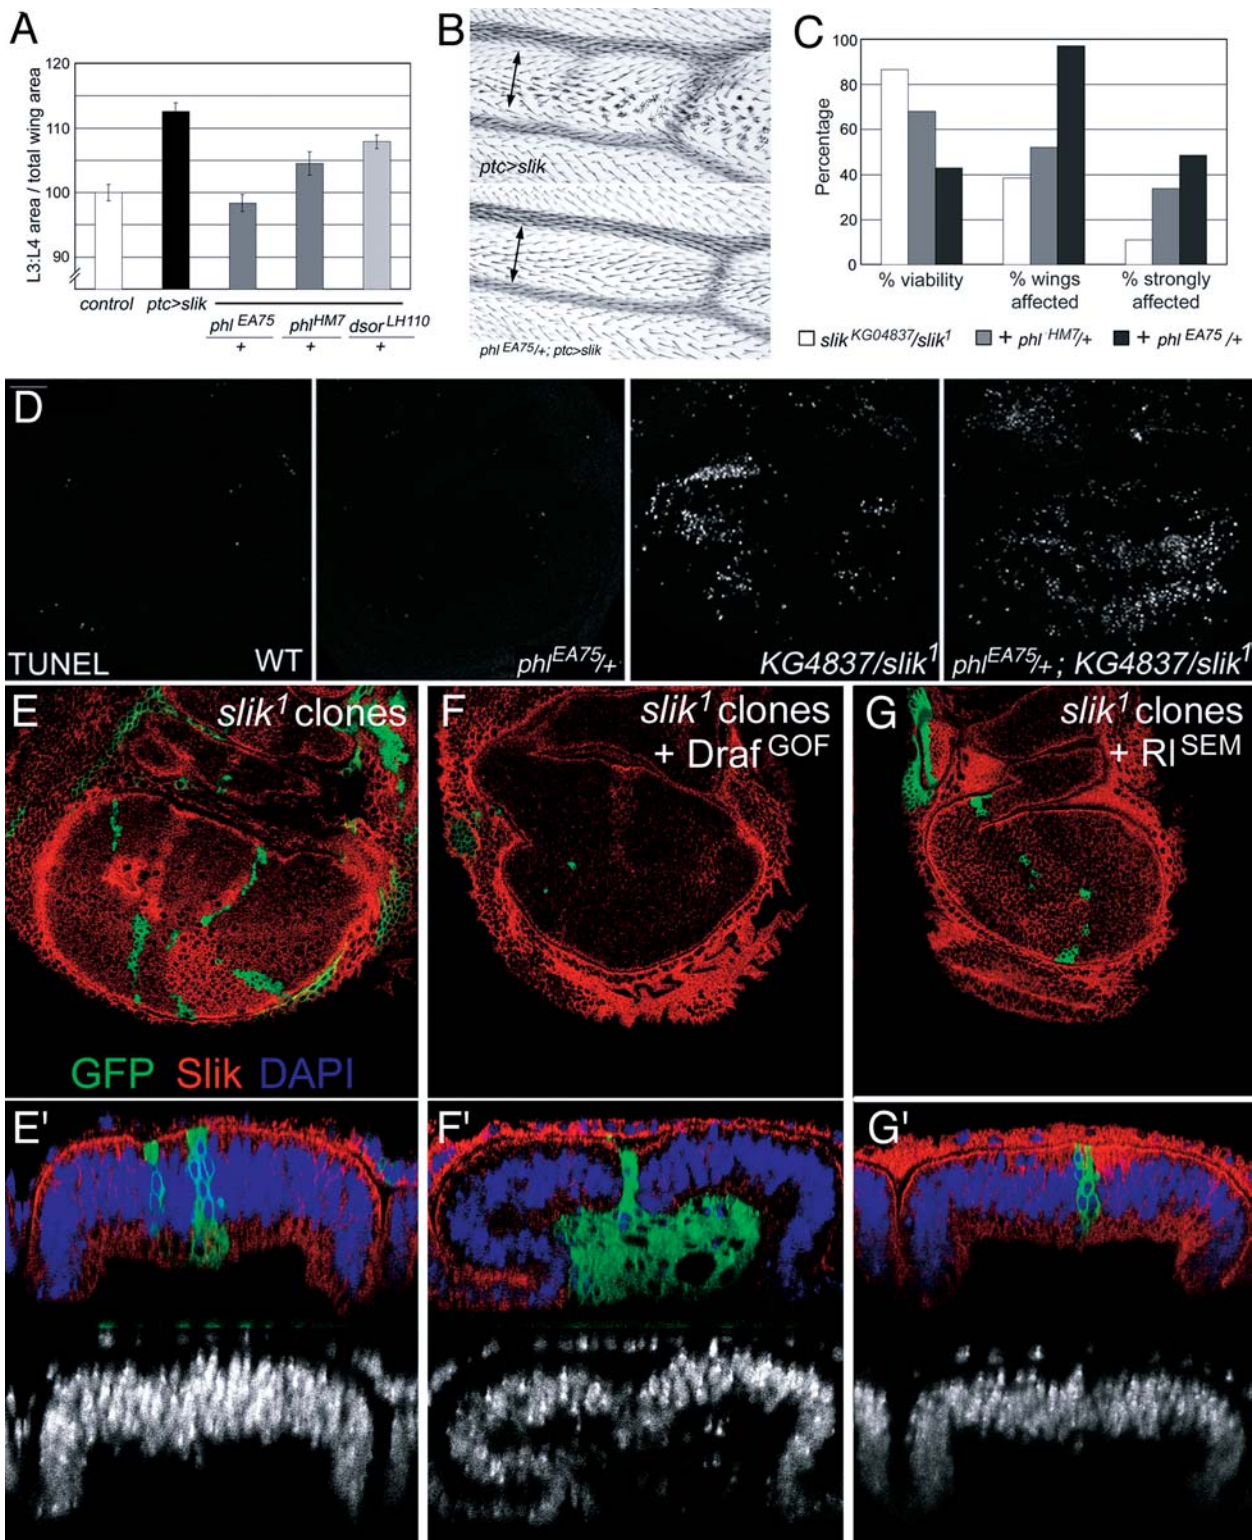

**Figure 10. Slik Acts via Raf to Control Cell Survival and Cell Proliferation**

(A and B) *ptc<sup>GAL4</sup> UAS-slik* phenotype in different genetic backgrounds.

(A) Quantification of the area between veins 3 and 4 as a function of total wing area. Control: wild-type flies. Other genotypes as indicated.

(B) Detail of the vein 3–4 region in *ptc<sup>GAL4</sup> UAS-slik* and Raf heterozygous *phl<sup>EA75</sup>/+; ptc<sup>GAL4</sup> UAS-slik* wings. The multiple wing hair phenotype characteristic of Slik overexpression was suppressed when one copy of Raf was removed and the spacing between the veins was reduced.

(C) Survival rates and assessment of the severity of the wing phenotypes in flies of the indicated genotypes.

(D) TUNEL labeling of wing discs to visualize apoptotic cells. Genotypes as indicated. (E–G) *slik<sup>1</sup>* mutant clones labeled by expression of GFP (green) and by the absence of Slik protein (red). Larval genotypes: *UAS-CD8-GFP hsFlp; FRT42 Gal80/FRT42 slik<sup>1</sup>; Tub-Gal4/+*. (F) Plus *UAS-Raf<sup>GOF</sup>*.

(G) Plus *UAS-RI<sup>SEM</sup>*. Lower panels show optical sections perpendicular to the plane of the epithelium. DAPI (blue) shown alone below.

DOI: 10.1371/journal.pbio.0000035.g0010

netic furrow (Dominguez et al. 1998; Baker and Yu 2001; Halfar et al. 2001). Activated forms of Ras and Raf promote tissue growth, and high levels of activated Ras can induce apoptosis (Karim and Rubin 1998; Prober and Edgar 2000, 2002).

Although Slik is not a core component of the ERK pathway, our findings suggest that Slik activates Raf to control cell survival and cell proliferation. What are the differences between RTK-mediated and Slik-mediated activation of Raf? The growth and survival functions of the ERK pathway are thought to require low-intensity signaling (Baker and Yu 2001; Halfar et al. 2001; Yang and Baker 2003). Stronger Raf-dependent ERK activation is required for cell fate specification in response to high-threshold EGFR signaling. Repeated cycles of strong ERK activation are responsible for sequential cell fate specification events in the eye imaginal disc (Freeman 1996). High-level activation of ERK specifies vein cell fate in the wing disc (as visualized by antibody to doubly phosphorylated ERK; Gabay et al. 1997). Activation of ERK in proliferating wing cells is not detectable by this antibody. Clones of cells lacking Slik activity do not cause defects in vein differentiation or in cell fate specification in the eye (data not shown). Elevated Slik expression stimulates cell proliferation, but does not cause a detectable increase in the level of ERK phosphorylation in S2 cells (data not shown). This suggests that Slik-mediated activation of Raf is not required for high-threshold ERK responses.

Both Raf and Sor (MAPKK) act downstream of Slik based on the ability of mutations in either kinase to dominantly suppress Slik-induced tissue growth. However, a deficiency removing ERK had little effect in the same assay. It may be that ERK levels are not limiting because Slik is involved only in low-level ERK activation. Alternatively, Slik may regulate Raf- and MEK-dependent survival and proliferation independently of ERK. This view is supported by our finding that activation of Raf is able to replace the requirement for Slik and support survival of *slik* mutant cells, whereas activation of ERK is not able to do so. There is increasing evidence supporting an ERK-independent function of Raf proteins, particularly in the regulation of cell survival/apoptosis (reviewed in Hindley and Kolch 2002). Furthermore, Raf activity may be connected to cell survival signaling by other kinase-independent mechanisms (Chen et al. 2002).

### Are Mammalian Homologues of *slik* Oncogenes?

The observation that increased *slik* expression promotes proliferation and tissue growth while at the same time increasing the rate of apoptosis is reminiscent of the effects of oncogenes. In mammalian systems, it has long been known that driving cell proliferation by expression of oncogenes such as *MYC*, *E2F*, and *RAS* or by removal of tumor suppressors, such as *RB*, concomitantly promotes apoptotic

cell death. Similar observations have been made in flies, for example, by overexpression of *ras* or *E2F* (Du et al. 1996; Karim and Rubin 1998; Neufeld et al. 1998) and in cells lacking the tumor suppressor RBF (Datar et al. 2000). It has been suggested that the signal to proliferate inherently sensitizes cells to apoptosis. In order to respond to such a signal by dividing rather than dying, a cell must receive sufficient survival cues at the same time. This dual signal model provides a means for constraining cellular proliferation in the context of a multicellular organism by making any individual cell dependent upon survival cues from its neighbors in order to grow and divide productively (Evan et al. 1994; Evan and Littlewood 1998).

One prediction of this model is that a cancer cell must activate both growth-promoting genes and anti-apoptotic genes in order to continuously proliferate inappropriately in vivo (Pelengaris et al. 2000). Regulated activation of *c-MYC* in pancreatic  $\beta$ -cells induced  $\beta$ -cell proliferation accompanied by massive apoptosis, resulting in involution of the islets (Pelengaris et al. 2002). Co-expression of the anti-apoptotic protein Bcl-X<sub>L</sub> suppressed the MYC-induced apoptosis and resulted instead in rapid tumor formation. In flies, the *bantam* microRNA has been shown to promote cell proliferation and to simultaneously suppress apoptosis by translational repression of the proapoptotic gene *hid* (Brennecke et al. 2003). Like Ras and E2F, Slik activity simultaneously promotes cell proliferation and apoptosis. Substantial increases in cell number and tissue size are observed only when *slik*-induced apoptosis is blocked by coexpression of p35. In some cases, this resulted in tumor-like outgrowths in the wing. It will be of interest to learn whether the mammalian SLK and LOK proteins play a similar role in the control of growth and apoptosis.

### Materials and Methods

**Fly strains.** The 2300 EP lines (Rorth et al. 1998) and 8500 EPg strains (Mata et al. 2000) were screened as described (Hipfner et al. 2002). *KG04837* was kindly provided by Hugo Bellen. Other strains are described in FlyBase. A full-length *UAS-slik* transgene identical to the *slik-RA* transcript (GADFLY release 3) was prepared using ESTs *LD34405* and *GH20991*. An *EcoRI-NotI* fragment from *LD34405* (containing the 5' UTR and 2502 nucleotides of coding sequence) and a *NotI-XhoI* fragment (containing 1401 nucleotides of coding sequence and the 3' UTR) were cloned into the *EcoRI-XhoI* sites of pUAST. Several independent transformants produced similar phenotypes of varying strengths when crossed to a series of GAL4-driver lines. The transgene used in this report is an insert on the X-chromosome that gave the mildest phenotypes.

**Generation and characterization of the *slik*<sup>kd</sup> allele.** *EPg(2)20348* is viable and causes no phenotype. Excisions of *EPg(2)20348* were tested for complementation of the deletion *Df(2R)Px<sup>2</sup>*. Those failing to complement *Df(2R)Px<sup>2</sup>* were analyzed by Southern blotting. *slik*<sup>kd</sup> was a deletion of approximately 4 kb. The adjacent *NotI-EcoRI* fragment containing the 3' portion of the *slik* gene was unchanged. *slik*<sup>kd</sup>

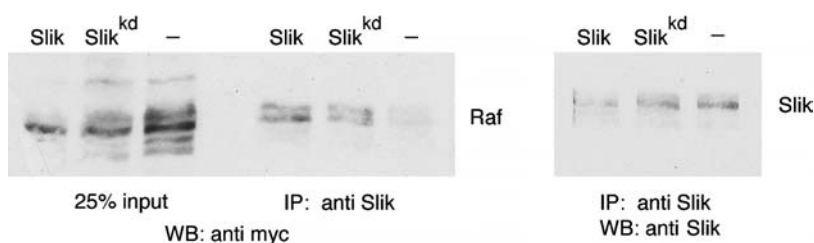

**Figure 11.** Slik Binds to Raf

(Right) Endogenous Slik protein, or transfected Slik or Slik<sup>kd</sup> proteins were immunoprecipitated from S2 cells with anti-Slik. (Left) The blot was probed with anti-Myc to visualize co-precipitation of Myc-tagged Raf.

DOI: 10.1371/journal.pbio.0000035.g0011

complemented *l(2)K08003*, an allele of the immediately upstream *mov34* gene, suggesting that the deletion only mutates the *slik* locus.

**Genotypes of larvae for generation of mosaic clones.** Genotypes were *w* *hs-FLP1*; *FRT42D* *P*(*armadillo-lacZ*)/*FRT42D* *slik*<sup>1</sup> and *w* *hs-FLP1*; *FRT42D* *P*( $\pi$ myc) *M*(2)53<sup>1</sup>/*FRT42D* *slik*<sup>1</sup> and *w* *f*<sup>36a</sup> *hs-FLP1*/*Y*; *FRT42D* *P*(*f*<sup>+</sup>) *P*(*f*<sup>+</sup>) *M*(2)l<sup>2</sup>/*FRT42D* *slik*<sup>1</sup> and *UAS-CD8-GFP* *hsFlp*; *FRT42* *Gal80/FRT42* *slik*<sup>1</sup>; *Tub-Gal4*+/ and *UAS-CD8-GFP* *hsFlp*; *FRT42* *Gal80/FRT42* *slik*<sup>1</sup>; *Tub-Gal4/UAS-Raf*<sup>G<sup>OF</sup></sup> and *hep*<sup>r75</sup>/*Y*; *FRT42D* *P*( $\pi$ myc) *M*(2)53<sup>1</sup>/*FRT42D* *slik*<sup>1</sup>; *hsFLP3*.

**Analysis of larval and adult phenotypes.** Crosses were carried out at 25°C unless otherwise indicated. For analysis of *slik* larval phenotypes, *w*; *arm*<sup>GAL4</sup> *FRT42D* *slik*<sup>1</sup>/*CyO* *Kr*<sup>GAL4</sup> *UAS-GFP* females were crossed to *FRT42D* *slik*<sup>1</sup>/*CyO* *Kr*<sup>GAL4</sup> *UAS-GFP* males. Embryos were collected for approximately 6 h on apple juice agar plates. After 24 h, newly hatched GFP-negative (*slik* homozygous mutant) and GFP-positive (heterozygous control) larvae were sorted, and 40–50 animals were transferred to vials containing softened food. Beginning 4 d later, larvae were collected every 2 d by floating them in 20% sucrose. After counting and assessment of the larval stage of each animal based on size and appearance of mouth hooks, they were returned to fresh vials. The progress to pupal stages and eclosion was also scored. To rescue the larval growth defect by transgene expression, females of the same genotype were crossed to *UAS-slik*/*Y*; *FRT42D* *slik*<sup>1</sup>/*CyO* *Kr*<sup>GAL4</sup> *UAS-GFP* males. In this case, only female GFP-negative offspring received the *UAS-slik* transgene. We therefore expected to see a rescue in only half of the animals. For BrdU labeling, larvae were transferred onto fly food containing 0.1 mg/ml BrdU. Larvae were dissected 16 h later and fixed in 8% formaldehyde/PBS, and BrdU incorporation was detected by standard techniques. Wing disc BrdU labeling was performed by incubating dissected larval anterior halves in serum-free medium containing 0.2 mg/ml BrdU for 1 h. To measure *slik* mutant clone areas, *w* *hs-FLP1*; *FRT42D* *armadillo-lacZ* females were crossed to *FRT42D* *slik*<sup>1</sup>/*CyO* *Kr*<sup>GAL4</sup> *UAS-GFP* males. Embryos were collected for 4 h. After 24 h, freshly hatched larvae (50 per vial) were transferred onto fresh food. Larvae were heat-shocked at 48 ± 2 h for 1 h at 37°C and dissected at 112 ± 2 h. Mutant clone and twospot areas were measured from confocal images using the histogram function of Adobe Photoshop (Adobe Systems Incorporated, San Jose, California, United States). TUNEL labeling was performed as described (Milán et al. 1997). Levels of TUNEL staining were measured from confocal images of *slik*<sup>KG04837</sup>/*slik*<sup>1</sup> (n = 13) and *ph<sup>EA7</sup>/+*; *slik*<sup>KG04837</sup>/*slik*<sup>1</sup> (n = 16) wing discs using functions of Adobe Photoshop. For the analysis of Slik overexpression phenotypes, *w*; *ptc*<sup>GAL4</sup> *UAS-GFP* females were crossed to either *w*<sup>1118</sup>, *UAS-slik*, *UAS-slik*; *UAS-p35*, *UAS-slik*<sup>kd</sup>, or *UAS-slik*<sup>kd</sup>; *UAS-p35* males. Embryos were collected for approximately 6 h and transferred to 18°C. After 24 h, newly hatched first-instar larvae (40 per vial) were transferred onto fresh food and returned to 18°C. Larvae were dissected at the wandering third-instar stage. Co-expression of Slik and p35 caused a developmental delay of approximately 2 d. Some vials were left at 18°C and adult flies were collected. Wings were mounted and imaged, and areas were measured using NIH Image (National Institute of Mental Health, Bethesda, Maryland, United States).

**Antibodies.** Mouse anti-BrdU was from PharMingen (San Diego,

California, United States). Rabbit anti-GFP was from Torrey Pines Biolabs (Houston, Texas, United States). Anti-DP-ERK was from Sigma (St. Louis, Missouri, United States). Rabbit anticleaved human caspase 3 antibody was from Cell Signaling Technology (Beverly, Massachusetts, United States). An antiserum raised against the same epitope has been shown to react with the cleaved form of the *Drosophila* caspase Drice and to label apoptotic cells in situ (Yu et al. 2002).

**Preparation of anti-Slik antibody.** Sequences encoding the central nonconserved domain of Slik were PCR amplified (5' primer: ATAGAATTTCGACCTCGACGACTGACTGTC; 3' primer ACG-TAAGCTTTGATCACCACCTCCTCTTCTC) and cloned into pCR2.1-TOPO (Invitrogen, Carlsbad, California, United States). An *EcoRI*–*HindIII* insert fragment was cloned into pET-23a (Novagen, Madison, Wisconsin, United States). The resulting fusion protein consisted of amino acids 335–863 of Slik fused to a C-terminal His<sub>6</sub> tag. The bacterially expressed fusion protein was solubilized in 8 M urea, 0.1 M NaH<sub>2</sub>PO<sub>4</sub>, and 0.01 M Tris (pH 8) and purified on a Ni<sup>2+</sup> column under denaturing conditions. Guinea pigs were injected with 50 µg of purified fusion protein in RIBI adjuvant at 3-wk intervals.

**Immunoprecipitation.** Myc epitope-tagged Raf, Slik, and Slik<sup>kd</sup> were cloned into pUAST. S2 cells were cotransfected with 3 µg each of pRmHa3-Gal4, pUAST-myc-RAF, and either empty pUAST, pUAST-Slik, or pUAST-Slik<sup>kd</sup> using CellFectin (Invitrogen). Transfected cells were induced with 0.7 mM CuSO<sub>4</sub> for 2 d. Cells were lysed in 200 µl of 50 mM Tris (pH 8), 150 mM NaCl, 0.5% CHAPS, protease inhibitors, and 75% of the cell lysate was diluted in 200 µl of lysis buffer and immunoprecipitated with 2 µl of anti-Slik. Western blots were probed with anti-Myc and then with anti-Slik.

## Supporting Information

**Accession Numbers** The accession numbers for the sequences reported in this paper are NM 138064 (*slik-RA*) and NM 166669 (*slik-RB*).

## Acknowledgments

We thank Lidia Perez for excellent technical support and B. Starling Emerald for help in isolating the *slik*<sup>1</sup> mutant. Marco Milan and Julius Brennecke made helpful comments on the manuscript. This work was supported by the European Molecular Biology Laboratory. DRH was a recipient of a European Molecular Biology Organization Long-Term Fellowship and a Human Frontiers Science Program Fellowship.

**Conflicts of Interest.** The authors have declared that no conflicts of interest exist.

**Author Contributions.** DRH and SMC conceived and designed the experiments. DRH performed the experiments. DRH and SMC analyzed the data. DRH and SMC wrote the paper. SMC discussed the experiments, design, and interpretation with DRH. ■

## References

- Adachi-Yamada T, Fujimura-Kamada K, Nishida Y, Matsumoto K (1999) Distortion of proximodistal information causes JNK-dependent apoptosis in *Drosophila* wing. *Nature* 400: 166–169.
- Baker NE, Yu SY (2001) The EGF receptor defines domains of cell cycle progression and survival to regulate cell number in the developing *Drosophila* eye. *Cell* 104: 699–708.
- Baonza A, Garcia-Bellido A (1999) Notch signaling directly controls cell proliferation in the *Drosophila* wing disc. *Proc Natl Acad Sci U S A* 97: 2609–2614.
- Baud V, Liu ZG, Bennett B, Suzuki N, Xia Y, et al. (1999) Signaling by proinflammatory cytokines: Oligomerization of TRAF2 and TRAF6 is sufficient for JNK and IKK activation and target gene induction via an amino-terminal effector domain. *Genes Dev* 13: 1297–1308.
- Brennecke J, Hipfner DR, Stark A, Russell RB, Cohen SM (2003) *bantam* encodes a developmentally regulated micro-RNA that controls cell proliferation and regulates the pro-apoptotic gene *hid* in *Drosophila*. *Cell* 113: 25–36.
- Britton JS, Edgar BA (1998) Environmental control of the cell cycle in *Drosophila*: Nutrition activates mitotic and endoreplicative cells by distinct mechanisms. *Development* 125: 2149–2158.
- Britton JS, Lockwood WK, Li L, Cohen SM, Edgar BA (2002) *Drosophila*'s insulin/PI3-kinase pathway coordinates cellular metabolism with nutritional conditions. *Dev Cell* 2: 239–249.
- Chadée DN, Yuasa T, Kyriakis JM (2002) Direct activation of mitogen-activated

- protein kinase kinase kinase MEK1 by the Ste20p homologue GCK and the adapter protein TRAF2. *Mol Cell Biol* 22: 737–749.
- Chen J, Fujii K, Zhang L, Roberts T, Fu H (2002) Raf-1 promotes cell survival by antagonizing apoptosis signal-regulating kinase 1 through a MEK-ERK independent mechanism. *Proc Natl Acad Sci U S A* 98: 7783–7788.
- Conlon I, Raff M (1999) Size control in animal development. *Cell* 96: 235–244.
- Dan I, Watanabe NM, Kusumi A (2001) The Ste20 group kinases as regulators of MAP kinase cascades. *Trends Cell Biol* 11: 220–230.
- Datar SA, Jacobs HW, de la Cruz AF, Lehner CF, Edgar BA (2000) The *Drosophila* cyclin D-*cdk4* complex promotes cellular growth. *EMBO J* 19: 4543–4554.
- Dhillon AS, Kolch W (2002) Untying the regulation of the Raf-1 kinase. *Arch Biochem Biophys* 404: 3–9.
- Diaz-Benjumea FJ, Hafén E (1994) The *sevenless* signalling cassette mediates *Drosophila* EGF receptor function during epidermal development. *Development* 120: 569–578.
- Dominguez M, Wasserman JD, Freeman M (1998) Multiple functions of the EGF receptor in *Drosophila* eye development. *Curr Biol* 8: 1039–1048.
- Du W, Xie JE, Dyson N (1996) Ectopic expression of dE2F and dDP induces cell proliferation and death in the *Drosophila* eye. *EMBO J* 15: 3684–3692.
- Endo J, Toyama-Sorimachi N, Taya C, Kuramochi-Miyagawa S, Nagata K, et al. (2000) Deficiency of a STE20/PAK family kinase LOK leads to the acceleration of LFA-1 clustering and cell adhesion of activated lymphocytes. *FEBS Lett* 468: 234–238.
- Evan G, Littlewood T (1998) A matter of life and cell death. *Science* 281: 1317–1322.

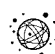

- Evan G, Harrington E, Fanidi A, Land H, Amati B, et al. (1994) Integrated control of cell proliferation and cell death by the *c-myc* oncogene. *Philos Trans R Soc Lond B Biol Sci* 345: 269–275.
- Freeman M (1996) Reiterative use of the EGF receptor triggers differentiation of all cell types in the *Drosophila* eye. *Cell* 87: 651–660.
- Gabay L, Seger R, Shilo BZ (1997) *In situ* activation pattern of *Drosophila* EGF receptor pathway during development. *Science* 277: 1103–1106.
- Galloni M, Edgar BA (1999) Cell-autonomous and nonautonomous growth-defective mutants of *Drosophila melanogaster*. *Development* 126: 2365–2375.
- Gibson MC, Schubiger G (2000) Peripodial cells regulate proliferation and patterning of *Drosophila* imaginal discs. *Cell* 103: 343–350.
- Gibson MC, Lehman DA, Schubiger G (2002) Lumenal transmission of decapentaplegic in *Drosophila* imaginal discs. *Dev Cell* 3: 451–460.
- Go MJ, Eastman DS, Artavanis-Tsakonas S (1998) Cell proliferation control by Notch signaling in *Drosophila* development. *Development* 125: 2031–2040.
- Halfar K, Rommel C, Stocker H, Hafen E (2001) Ras controls growth, survival and differentiation in the *Drosophila* eye by different thresholds of MAP kinase activity. *Development* 128: 1687–1696.
- Harvey KF, Pfeleger CM, Hariharan IK (2003) The *Drosophila* *Mst* ortholog, *hippo*, restricts growth and cell proliferation and promotes apoptosis. *Cell* 114: 457–467.
- Hindley A, Kolch W (2002) Extracellular signal-regulated kinase (ERK)/mitogen activated protein kinase (MAPK)-independent functions of Raf kinases. *J Cell Sci* 115: 1575–1581.
- Hipfner DR, Weigmann K, Cohen SM (2002) The *bantam* gene regulates *Drosophila* growth. *Genetics* 161: 1527–1537.
- Igaki T, Kanda H, Yamamoto-Goto Y, Kanuka H, Kuranagam E, et al. (2002). Eiger, a TNF superfamily ligand that triggers the *Drosophila* JNK pathway. *EMBO J* 21: 3009–3018.
- Johnston LA, Prober DA, Edgar BA, Eisenman RN, Gallant P (1999) *Drosophila myc* regulates cellular growth during development. *Cell* 98: 779–790.
- Justice RW, Zilian O, Woods DF, Noll M, Bryant PJ (1995) The *Drosophila* tumor suppressor gene *warts* encodes a homolog of human myotonic dystrophy kinase and is required for the control of cell shape and proliferation. *Genes Dev* 9: 534–546.
- Kanda H, Igaki T, Kanuka H, Yagi T, Miura M (2002) Wengen, a member of the *Drosophila* tumor necrosis factor receptor superfamily, is required for Eiger signaling. *J Biol Chem* 277: 28372–28375.
- Kango-Singh M, Nolo R, Tao C, Verstreken P, Hiesinger PR, et al. (2002) Sharpei mediates cell proliferation arrest during imaginal disc growth in *Drosophila*. *Development* 129: 5719–5730.
- Karim FD, Rubin GM (1998) Ectopic expression of activated Ras1 induces hyperplastic growth and increased cell death in *Drosophila* imaginal tissues. *Development* 125: 1–9.
- Lee T, Luo L (1999) Mosaic analysis with a repressible cell marker for studies of gene function in neuronal morphogenesis. *Neuron* 22: 451–461.
- Martin-Blanco E, Gampel A, Ring J, Virdee K, Kirov N, et al. (1998) *puckered* encodes a phosphatase that mediates a feedback loop regulating JNK activity during dorsal closure in *Drosophila*. *Genes Dev* 12: 557–570.
- Mata J, Curado S, Ephrussi A, Rorth P (2000) Tribbles coordinates mitosis and morphogenesis in *Drosophila* by regulating string/CDC25 proteolysis. *Cell* 101: 511–522.
- Meyer CA, Jacobs HW, Datar SA, Du W, Edgar BA, et al. (2000) *Drosophila cdk4* is required for normal growth and is dispensable for cell cycle progression. *EMBO J* 19: 4533–4542.
- Milán M, Campuzano S, Garcia-Bellido A (1997) Developmental parameters of cell death in the wing disc of *Drosophila*. *Proc Natl Acad Sci U S A* 94: 5691–5696.
- Milán M, Pirez L, Cohen SM (2002) Short-range cell interactions and cell survival in the *Drosophila* wing. *Dev Cell* 2: 797–805.
- Miller DT, Cagan RL (1998) Local induction of patterning and programmed cell death in the developing *Drosophila* retina. *Development* 125: 2327–2335.
- Moreno E, Basler K, Morata G (2002a) Cells compete for decapentaplegic survival factor to prevent apoptosis in *Drosophila* wing development. *Nature* 416: 755–759.
- Moreno E, Yan M, Basler K (2002b) Evolution of TNF signaling mechanisms: JNK-dependent apoptosis triggered by Eiger, the *Drosophila* homolog of the TNF superfamily. *Curr Biol* 12: 1263–1268.
- Neufeld TP, de la Cruz AF, Johnston LA, Edgar BA (1998) Coordination of growth and cell division in the *Drosophila* wing. *Cell* 93: 1183–1193.
- Oldham S, Hafen E (2003) Insulin/IGF and target of rapamycin signaling: A TOR de force in growth control. *Trends Cell Biol* 13: 79–85.
- Pelengaris S, Rudolph B, Littlewood T (2000) Action of Myc *in vivo*: Proliferation and apoptosis. *Curr Opin Genet Dev* 10: 100–105.
- Pelengaris S, Khan M, Evan GI (2002) Suppression of Myc-induced apoptosis in beta cells exposes multiple oncogenic properties of Myc and triggers carcinogenic progression. *Cell* 109: 321–334.
- Prober DA, Edgar BA (2000) Ras1 promotes cellular growth in the *Drosophila* wing. *Cell* 100: 435–446.
- Prober DA, Edgar BA (2002) Interactions between Ras1, dMyc, and dPI3K signaling in the developing *Drosophila* wing. *Genes Dev* 16: 2286–2299.
- Rorth P, Szabo K, Bailey A, Laverty T, Rehm J, et al. (1998) Systematic gain-of-function genetics in *Drosophila*. *Development* 125: 1049–1057.
- Royzman I, Whittaker AJ, Orr-Weaver TL (1997) Mutations in *Drosophila* DP and E2F distinguish G1–S progression from an associated transcriptional program. *Genes Dev* 15: 1999–2011.
- Sabourin LA, Tamai K, Seale P, Wagner J, Rudnicki MA (2000) Caspase 3 cleavage of the Ste20-related kinase SLK releases and activates an apoptosis-inducing kinase domain and an actin-disassembling region. *Mol Cell Biol* 20: 684–696.
- Saucedo LJ, Edgar BA (2002) Why size matters: Altering cell size. *Curr Opin Genet Dev* 12: 565–571.
- Schlessinger J (2000) Cell signaling by receptor tyrosine kinases. *Cell* 103: 211–215.
- Stocker H, Hafen E (2000) Genetic control of cell size. *Curr Opin Genet Dev* 10: 529–535.
- Tapon N, Harvey K, Bell D, Wahrer D, Schiripo T, et al. (2002) *salvador* promotes both cell cycle exit and apoptosis in *Drosophila* and is mutated in human cancer cell lines. *Cell* 110: 467–478.
- Wagner S, Flood T, O'Reilly P, Hume K, Sabourin LA (2002) Association of the Ste20-like kinase SLK with the microtubule: Role in Rac1-mediated regulation of actin dynamics during cell adhesion and spreading. *J Biol Chem* 277: 37685–37692.
- Wu S, Huang J, Dong J, Pan DJ (2003) *hippo* encodes a Ste-20 family protein kinase that restricts cell proliferation and promotes apoptosis in conjunction with *salvador* and *warts*. *Cell* 114: 445–456.
- Xu T, Rubin GM (1993) Analysis of genetic mosaics in developing and adult *Drosophila* tissues. *Development* 117: 1223–1237.
- Xu T, Wang W, Zhang S, Stewart RA, Yu W (1995) Identifying tumor suppressors in genetic mosaics: The *Drosophila lats* gene encodes a putative protein kinase. *Development* 121: 1053–1063.
- Yang L, Baker NE (2003) Cell cycle withdrawal, progression, and cell survival regulation by EGFR and its effectors in the differentiating *Drosophila* eye. *Dev Cell* 4: 359–369.
- Yu SY, Yoo SJ, Yang L, Zapata C, Sr inivasan A, et al. (2002) A pathway of signals regulating effector and initiator caspases in the developing *Drosophila* eye. *Development* 129: 3269–3278.
